# Supplementary material for: A fluorinated bihydrazide conjugate for activatable sensing and imaging of hypochlorous acid by 19F NMR/MRI
Source: Royal Society of Chemistry journal article supplement (doi:10.1039/c9cc06622e), 2019-01-01

## Electronic Supplementary Information

### A fluorinated bihydrazide conjugate for activatable sensing and imaging of hypochlorous acid by $^{19}\text{F}$ NMR/MRI

Ao Li<sup>‡</sup>, Xiaoxue Tang<sup>‡</sup>, Xuanqing Gong, Hongming Chen, Hongyu Lin\*, and Jinhao Gao\*

State Key Laboratory of Physical Chemistry of Solid Surfaces, The MOE Laboratory of Spectrochemical Analysis & Instrumentation, The Key Laboratory for Chemical Biology of Fujian Province, and Department of Chemical Biology, College of Chemistry and Chemical Engineering, Xiamen University, Xiamen 361005, China.

<sup>‡</sup>These authors contributed equally to this work.

\*E-mail: [hylin007@xmu.edu.cn](mailto:hylin007@xmu.edu.cn), [jhgao@xmu.edu.cn](mailto:jhgao@xmu.edu.cn)

## Materials

Cyclen (98%), *tert*-Butyl bromoacetate(99%), Hydrazine hydrate(99%), 3,5-bis(trifluoromethyl) benzoyl chloride(97%), Gadolinium(III) chloride hexahydrate were purchased from Aladdin (China); Methyl chloroacetate, isobutyl chloroformate 4-methylmorpholine and trifluoroacetic acid were purchased from Inno-Chem (China). Triethylamine (99%) were purchased from J&K Scientific (China). All chemicals were used as received.

## Synthesis

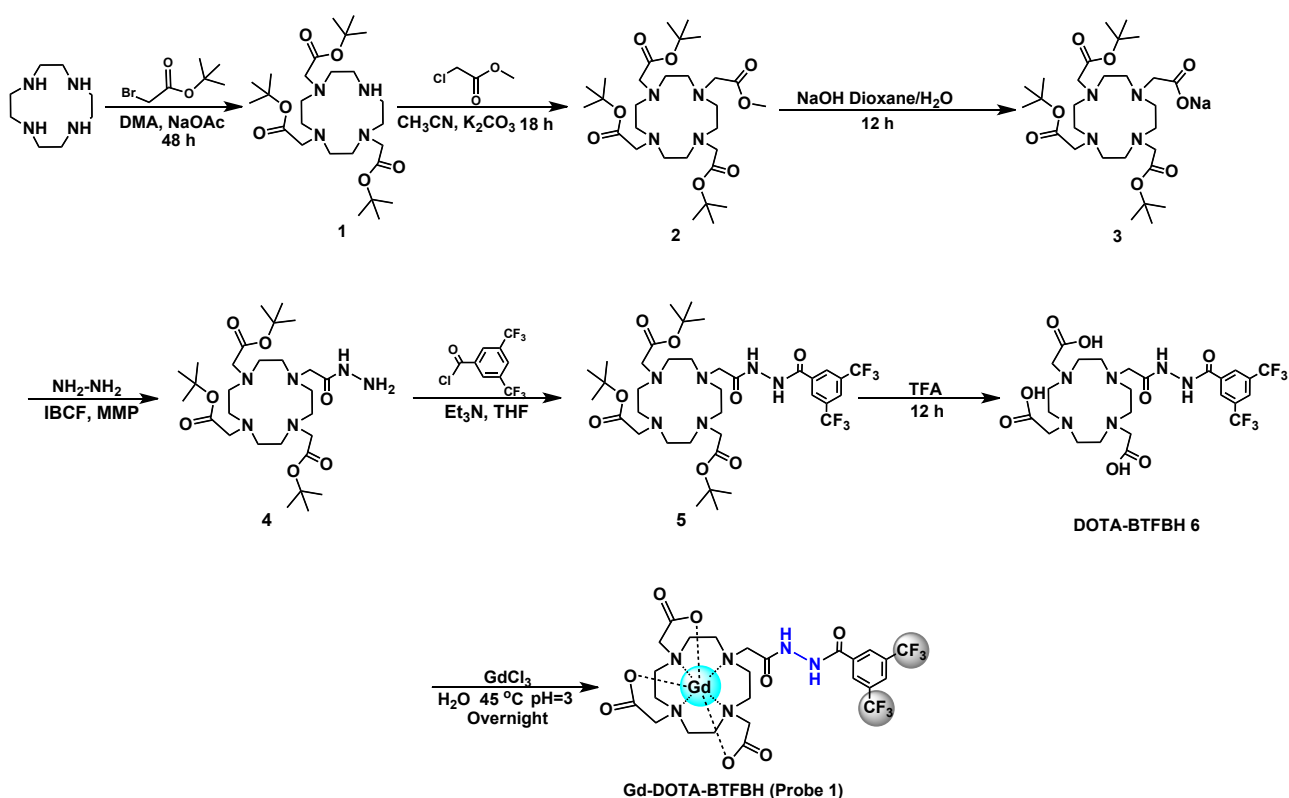

**Scheme S1.** Synthesis of Gd-DOTA-BTFBH (Probe 1).

### Synthesis of tri-*tert*-butyl 2,2',2''-(1,4,7,10-tetraazacyclododecane-1,4,7-triyl)triacetate (1)

*tert*-Butyl bromoacetate (1.3 g, 7.6 mmol, 3.3 equiv) dissolved in 10.0 mL of anhydrous chloroform was added dropwise over 0.5 h to a solution of 1,4,7,10-tetraazacyclododecane (cyclen) (400 mg, 2.32 mmol) and triethylamine (2.3 g, 23.2 mmol, 10.0 equiv) in 40 mL of anhydrous chloroform. The reaction mixture

---

was stirred for another 2 h and anhydrous  $\text{K}_2\text{CO}_3$  (0.16 g, 1.16 mmol, 0.5 equiv) was added. After 24 h, the resulting solution was washed with water ( $3 \times 40$  mL). The organic phase was dried with  $\text{MgSO}_4$  and concentrated. This crude product was purified by flash chromatography (15% v/v  $\text{CH}_3\text{OH}/\text{CH}_2\text{Cl}_2$ ) on silica gel to give **1** (3.0 g, 5.8 mmol, 77%) as a white powder.  $^1\text{H}$  NMR (400 MHz,  $\text{CDCl}_3$ ):  $\delta$  3.34 (4 H, m) 3.26 (2 H, m), 3.05 (4 H, m), 2.89-2.85 (12 H, m), 1.47 (27 H, s), the peak for  $-\text{NH}-$  on the ring could not be observed; ESI-MS ( $m/z$ ) calcd for  $\text{C}_{26}\text{H}_{51}\text{N}_4\text{O}_6$  [ $\text{M} + \text{H}^+$ ]: 515.4, found: 515.4

### Synthesis of Compound 2

To a 100 mL round-bottom flask was added **1** (129.5 mg, 0.25 mmol),  $\text{K}_2\text{CO}_3$  (82.3 mg, 0.6 mmol, 2 equiv) and 20 mL of anhydrous acetonitrile. Methyl chloroacetate (70 mg, 0.65 mmol, 1.1 equiv) was added to the mixture. The suspension was vigorously stirred at room temperature for 4 h. After filtration, the filtrate was concentrated. The residue was purified by flash chromatography (100%  $\text{CH}_2\text{Cl}_2$  to 20% v/v  $\text{CH}_3\text{OH}/\text{CH}_2\text{Cl}_2$ ) to give **2** (131.8 mg, 0.22 mmol, 90%) as a yellow oil.  $^1\text{H}$  NMR (400 MHz,  $\text{CD}_3\text{OD}$ ):  $\delta$  3.76 (3 H, s) 3.29-3.57 (4 H, m), 2.21-3.40 (20 H, m), 1.52 (27 H, s); ESI-MS ( $m/z$ ) calcd for  $\text{C}_{29}\text{H}_{54}\text{N}_4\text{NaO}_8$  [ $\text{M} + \text{Na}^+$ ]: 609.4, found: 609.3, which is consistent with the previous report (*Nanoscale*, 2017, **9**, 4516-4523).

### Synthesis of Compound 3

To a 50 mL round-bottom flask was added **2** (117.2 mg, 0.2 mmol), and 20 mL of NaOH (0.6 M) in dioxane/ $\text{H}_2\text{O}$  (v/v = 2:1). The mixture was vigorously stirred at 50 °C overnight and concentrated *in vacuo*. Subsequently, the residue was dissolved in water and extracted with DCM (20 mL  $\times$  3). The organic phases were collected, dried with  $\text{Na}_2\text{SO}_4$ , and concentrated to give **3** (107.12 mg, 0.18 mmol, 90%) as a white solid.  $^1\text{H}$  NMR (400 MHz,  $\text{CD}_3\text{OD}$ ):  $\delta$  3.29-3.57 (4 H, m), 2.02-3.22 (m, 20 H), 1.48 (s, 27 H); ESI-MS ( $m/z$ ) calcd for  $\text{C}_{28}\text{H}_{51}\text{N}_4\text{NaO}_8$  [ $\text{M} + \text{H}^+$ ]: 595.4, found: 595.4, which is consistent with the previous report (*Tetrahedron Lett.*, 2009, **50**, 2929-2931).

---

### Synthesis of Compound 4

**3** (238 mg, 0.4 mmol) and 15 mL of anhydrous acetonitrile were added to a round-bottom flask under N<sub>2</sub>. Then isobutyl chloroformate (0.4 mmol, 50.8  $\mu$ L, 1.0 equiv) and 4-methylmorpholine (0.4 mmol, 45  $\mu$ L, 1.0 equiv) were added. The mixture was vigorously stirred at 0 °C for 30 min before warmed to room temperature. Hydrazine hydrate (0.4 mmol, 35  $\mu$ L) was added and the resulting mixture was further stirred for 2 h then concentrated *in vacuo*. Subsequently, the residue was dissolved in DCM (20 mL) and washed with water (20 mL  $\times$  3). The organic phase was dried with MgSO<sub>4</sub> and concentrated. The crude product was purified by flash chromatography (20% v/v CH<sub>3</sub>OH/CH<sub>2</sub>Cl<sub>2</sub>) on silica gel to give **4** (165 mg, 0.28 mmol, 70%) as an off-white powder. <sup>1</sup>H NMR (600 MHz, CD<sub>3</sub>OD):  $\delta$  1.81-3.84 (a set of very broad and multiple peaks with an integration corresponding to 24 H), 1.50 (s, 27 H, *t*-Bu), the peaks for –NHNH<sub>2</sub> could not be observed; <sup>13</sup>C NMR (151 MHz, CD<sub>3</sub>OD):  $\delta$  174.04, 173.03, 171.63, 81.45, 55.81, 55.33, 55.38, 55.17, 54.81, 54.30, 53.2-50.9 (m), 27.06. HR-ESI-MS (*m/z*) calcd for C<sub>28</sub>H<sub>54</sub>N<sub>6</sub>NaO<sub>7</sub> [*M* + Na<sup>+</sup>]: 609.3946, found: 609.3936.

### Synthesis of Compound 5

**4** (117.2 mg, 0.2 mmol) in 15 mL of anhydrous THF was cooled to 0 °C under N<sub>2</sub>. Then Et<sub>3</sub>N (2 mmol, 278  $\mu$ L, 10 equiv) and 3,5-bis(trifluoromethyl) benzoyl chloride (2 mmol, 363  $\mu$ L, 10 equiv) was added dropwise. The mixture was stirred at 0 °C for 18 h and concentrated *in vacuo*. This crude product was purified by flash chromatography (6% v/v CH<sub>3</sub>OH/CH<sub>2</sub>Cl<sub>2</sub>) on silica gel to give **5** (124 mg, 0.15 mmol, 75%) as a yellow powder. <sup>1</sup>H NMR (600 MHz, CD<sub>3</sub>OD):  $\delta$  8.49 (s, 2 H), 8.23 (s, 1 H),  $\delta$  2.80-4.64 (a set of very broad and multiple peaks with an integration corresponding to 24 H), 1.50 (s, 27 H, *t*-Bu), the peaks for –NHNH– could not be observed; <sup>13</sup>C NMR (151 MHz, CD<sub>3</sub>OD):  $\delta$  164.43, 160.43 (q, *J* C-F = 37.2 Hz), 134.38, 131.95 (q, *J* C-F = 33.2 Hz), 128.05, 125.9-125.6 (m), 125-124.5 (m) 123.01 (q, *J* C-F = 271.8 Hz), 116.19 (q, *J* C-F = 288.4 Hz), 55.2-52.5 (m), 26.95. HR-ESI-MS (*m/z*) calcd for C<sub>37</sub>H<sub>57</sub>F<sub>6</sub>N<sub>6</sub>NaO<sub>8</sub> [*M* + Na<sup>+</sup>]: 849.3956, found: 849.3940.

---

### Synthesis of DOTA-BTFBH (6)

**5** (124 mg, 0.15 mmol) and 3 mL of anhydrous trifluoroacetic acid was added to a round-bottom flask. The mixture was heated to 50 °C, stirred for 6 h and concentrated to give crude DOTA-BTFBH (**6**) as a red oil, which was directly used in the next step without further purification. A small portion of the crude DOTA-BTFBH (**6**) was purified by HPLC to give pure DOTA-BTFBH (**6**) as a white solid: <sup>1</sup>H NMR (600 MHz, CD<sub>3</sub>OD): δ 8.48 (s, 2 H), 8.20 (s, 1 H), δ 2.95-4.45 (a set of very broad and multiple peaks with an integration corresponding to 24 H), the peaks for –NHNH– and –COOH could not be observed; <sup>13</sup>C NMR (151 MHz, CD<sub>3</sub>OD): δ 164.62, 160.33 (q, *J* C-F = 36.2 Hz), 134.24, 131.77 (q, *J* C-F = 33.2 Hz), 128.11, 125.28, 123.06 (q, *J* C-F = 273.3 Hz), 120.36, 116.02 (q, *J* C-F = 289.9 Hz), 54.2-52.4 (m). HR-ESI-MS (*m/z*) calcd for C<sub>25</sub>H<sub>33</sub>F<sub>6</sub>N<sub>6</sub>O<sub>8</sub> [*M* + H<sup>+</sup>]: 659.2258, found: 659.2261.

### Synthesis of Gd-DOTA-BTFBH (Probe 1)

DOTA-BTFBH (65 mg, 0.1 mmol) was dissolved in 10 mL of DI H<sub>2</sub>O and GdCl<sub>3</sub>•6H<sub>2</sub>O (194.7 mg, 0.3 mmol, 3.0 equiv) was added. The pH was adjusted to ~ 4 with 0.1 M NaOH and the resulting mixture was stirred overnight at 50 °C. After lyophilization, the obtained white solid was dissolved in CH<sub>3</sub>CN and further purified by gradient elution using HPLC (ZORBAX SB-18 column from 98% CH<sub>3</sub>CN/2% H<sub>2</sub>O to 70% CH<sub>3</sub>CN/30% H<sub>2</sub>O, 025 min). HR-ESI-MS (*m/z*) calcd for C<sub>25</sub>H<sub>30</sub>F<sub>6</sub>GdN<sub>6</sub>O<sub>8</sub> [*M* + H<sup>+</sup>]: 814.1271, found: 814.1287.

**MS Characterization.** The molecular weights of the synthesized compounds were measured on an Esquire 3000 Plus electrospray ionization instrument using an ICR analyzer (ESI-MS) and Bruker FT-MS.

**<sup>1</sup>H MRI Characterization.** Relaxivity measurements and <sup>1</sup>H MRI phantom imaging was performed on a 0.5 T Niumag NMI20-Analyst system (Suzhou Niumag Analytical Instrument Corporation).

---

**<sup>19</sup>F NMR/MRI Characterization.** All <sup>19</sup>F NMR experiments were carried out on a Bruker AVANCE III HD Ascend 600 MHz spectrometer using a 5 mm BBFO cryoprobe. All <sup>19</sup>F NMR spectra were acquired with 18 μs delay and 200 scans. Samples were prepared with 5% D<sub>2</sub>O/H<sub>2</sub>O and CF<sub>3</sub>COONa (-75.4 ppm) was used as a reference for chemical shift. All *in vivo* <sup>1</sup>H/<sup>19</sup>F MRI and <sup>19</sup>F NMR spectra were acquired on a 9.4 T Bruker MRI scanner with commercially available <sup>19</sup>F/<sup>1</sup>H MRI coils.

**Detection of HClO and Other Analytes with Probe 1 by <sup>19</sup>F NMR.**

Probe **1** (final concentration 150 μM) treated with various analytes (final concentration ~0.45 mM) in a PBS buffer (50 mM, pH 7.4) at 25 °C for 5 min and subjected to <sup>19</sup>F NMR with the aforementioned parameters. ONOO<sup>-</sup> was generated by mixing NaNO<sub>2</sub> with H<sub>2</sub>O<sub>2</sub>, HO• was made by mixing (NH<sub>4</sub>)<sub>2</sub>Fe(SO<sub>4</sub>)<sub>2</sub> with H<sub>2</sub>O<sub>2</sub>, ROO• was made by dissolving 2,2'-azobis(2-amidinopropane) dihydrochloride (AAPH) in water. Other analytes were purchased from commercial sources and used as received.

**Phantom Imaging with <sup>19</sup>F MRI.**

Probe **1** (final concentration as indicated) was treated with HClO (1 equiv), or HClO (1 equiv) + taurine (1.2 equiv) for 13.5 min. The resulting solution was subjected to <sup>19</sup>F MRI. A FLASH sequence was used to acquire the <sup>19</sup>F MRI phantom images with the following parameters: TR/TE = 400 ms/3.3 ms, flip angle = 30°, FOV = 4 × 4 cm<sup>2</sup>, the slice thickness = 15 mm, Matrix = 32 × 32 and 64 average (NA=64). The total experiment time was about 13.5 min.

**Detection of HClO in Cells with <sup>19</sup>F NMR.** SMMC-7721 cells (~2×10<sup>6</sup>) were trypsinized and collected into a 1.5 mL centrifuge tube. After incubated with Probe **1** (Probe **1** final concentration: 1.5 mM) at 37 °C for 4 h and various stimuli including PBS, H<sub>2</sub>O<sub>2</sub> (5 equiv. or 10 equiv.), HClO (1 equiv.) + taurine (1.2 equiv.), or HClO (1 equiv.) for 30 min, the cells were centrifuged (600 × g, 3 min) and washed three times with PBS. Then cells were lysed with 300 μL of radio immunoprecipitation assay (RIPA) lysis buffer for 30 min, and the supernatants were collected for <sup>19</sup>F NMR.

---

**Imaging of HClO in Mice with  $^{19}\text{F}$  MRI.** Animal experiments were conducted according to the protocols approved by the Institutional Animal Care and Use Committee of Xiamen University. A nude mouse was subject to subcutaneous injections of Probe **1** (150  $\mu\text{L}$ , 10 mM in PBS (50 mM, pH 7.4)) to both the right and left flank followed by an injection of HClO (25  $\mu\text{L}$  1 mM in PBS (50 mM, pH 7.4)) to the right flank. Then the mouse was subjected to  $^1\text{H}$  MRI and  $^{19}\text{F}$  MRI. A FLASH sequence was used to acquire the  $^{19}\text{F}$  MR images with the following parameters: TR/TE = 400 ms/3.3 ms, flip angle =  $30^\circ$ , FOV =  $4 \times 4 \text{ cm}^3$ , the slice thickness = 15 mm, Matrix =  $32 \times 32$  and 64 average (NA=64). The total experiment time was about 13.5 min.

---

**Table. S1.**  $T_1$  and  $T_2$  relaxation times of  $^{19}\text{F}$  in DOTA-BTFBH, Probe **1** with & without HClO.

---

| Materials             | $T_1/\text{ms}$ | $T_2/\text{ms}$ | $T_2/T_1$ |
|-----------------------|-----------------|-----------------|-----------|
| DOTA-BTFBH            | 1260            | 915             | 0.72      |
| Probe <b>1</b>        | 2.1             | 1.1             | 0.524     |
| Probe <b>1</b> + HClO | 289             | 197             | 0.68      |

---



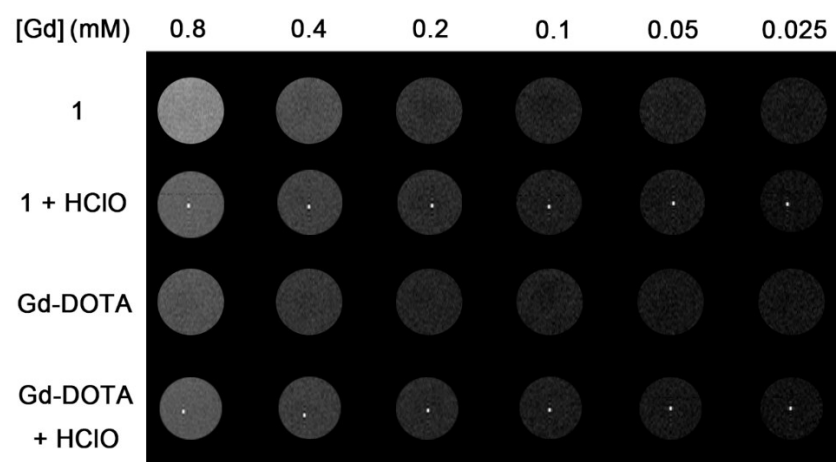

**Figure S1.**  $^1\text{H}$  MRI phantom images of Probe **1** and Gd-DOTA with or without HClO (1 equiv) at 0.5 T.

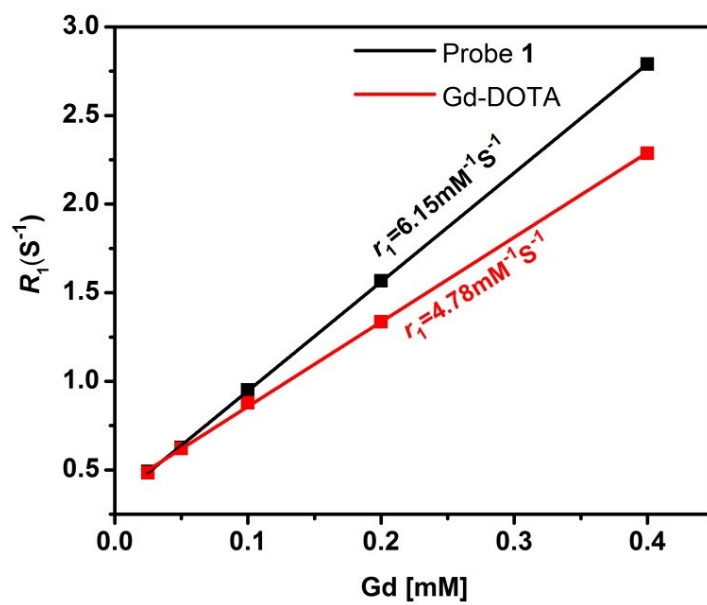

**Figure S2.** Relaxivities  $r_1$  of Probe 1 and Gd-DOTA in PBS at 0.5 T.

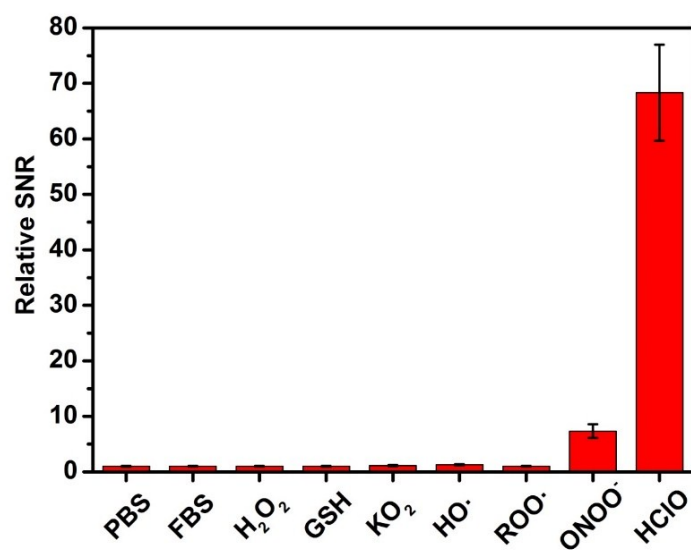

**Figure S3.** A plot showing the relative signal-noise ratios (SNRs) for the <sup>19</sup>F NMR spectra in Figure 2b. The SNR for the spectra of the PBS-treated sample was normalized as 1.0.

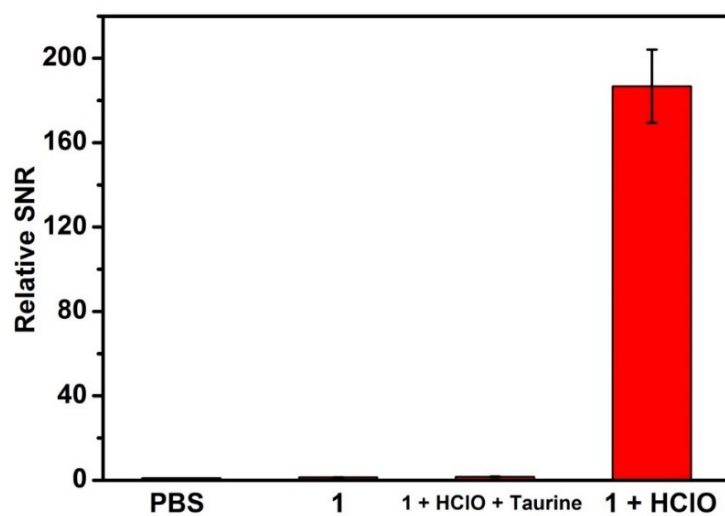

**Figure S4.** A plot showing the relative signal-noise ratios (SNRs) for  $^{19}\text{F}$  MRI phantom imaging in Figure 2c.

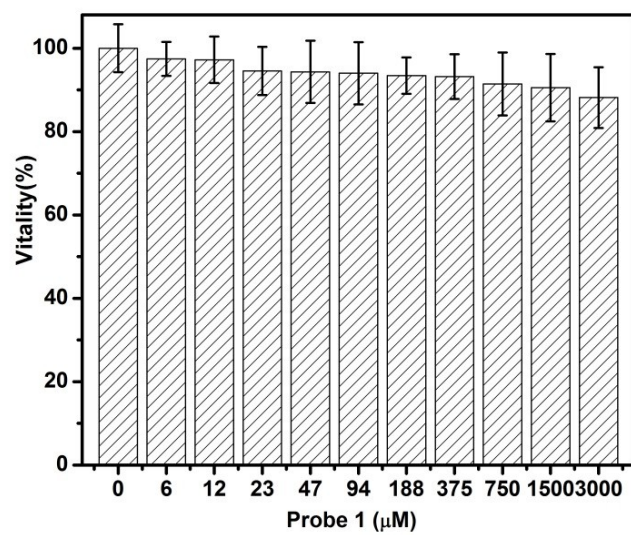

**Figure S5.** Cytotoxicity evaluation of Probe **1** with SMMC-7721 cells. Concentrations were with respect to Gd.

$^1\text{H}$ -NMR and  $^{13}\text{C}$ -NMR spectra of compound **4**

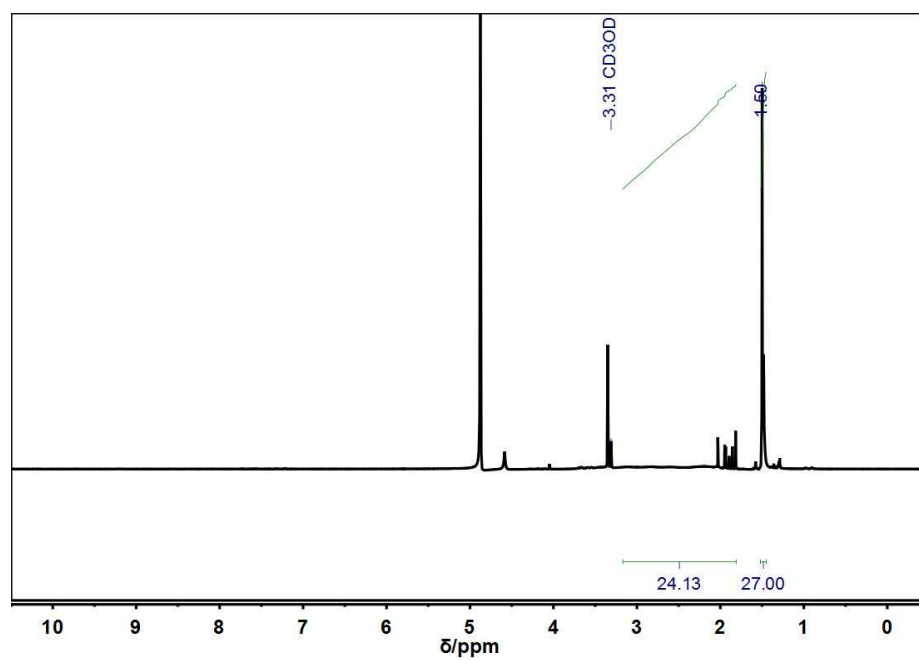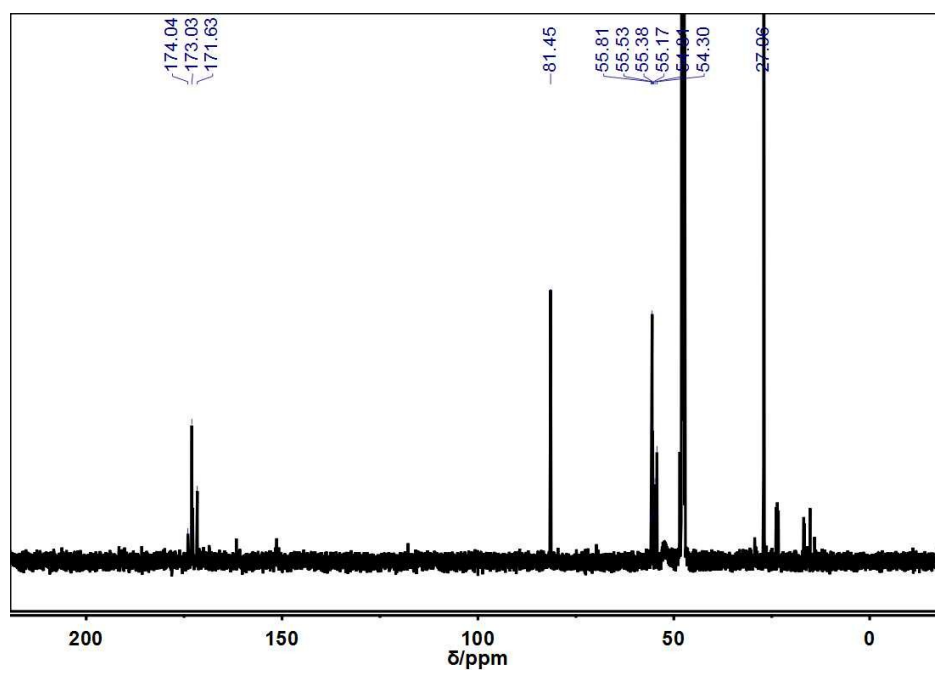

$^1\text{H}$ -NMR and  $^{13}\text{C}$ -NMR spectra of compound **5**

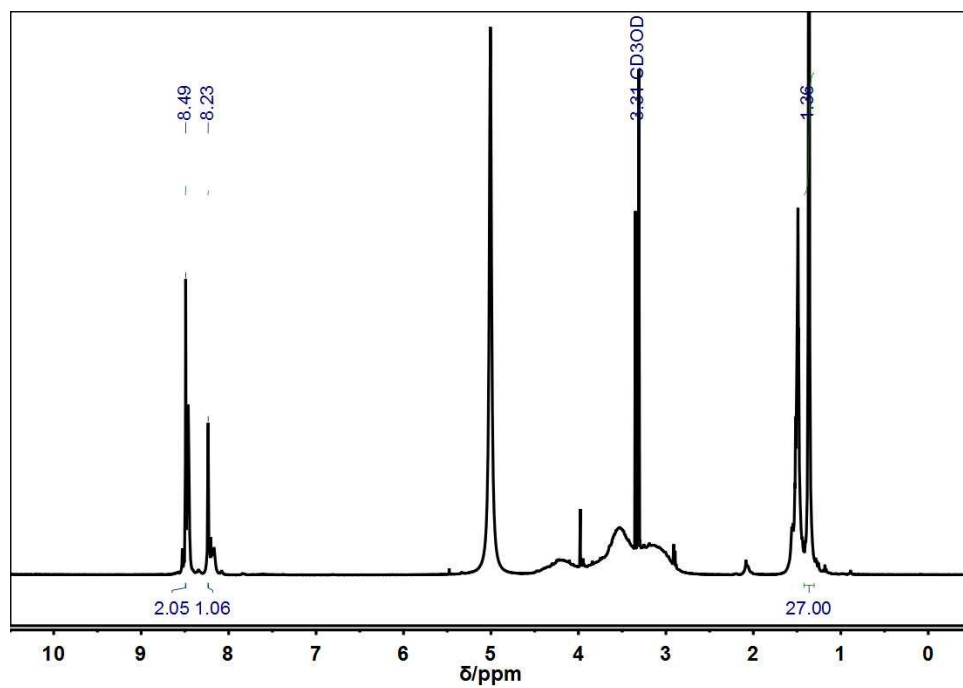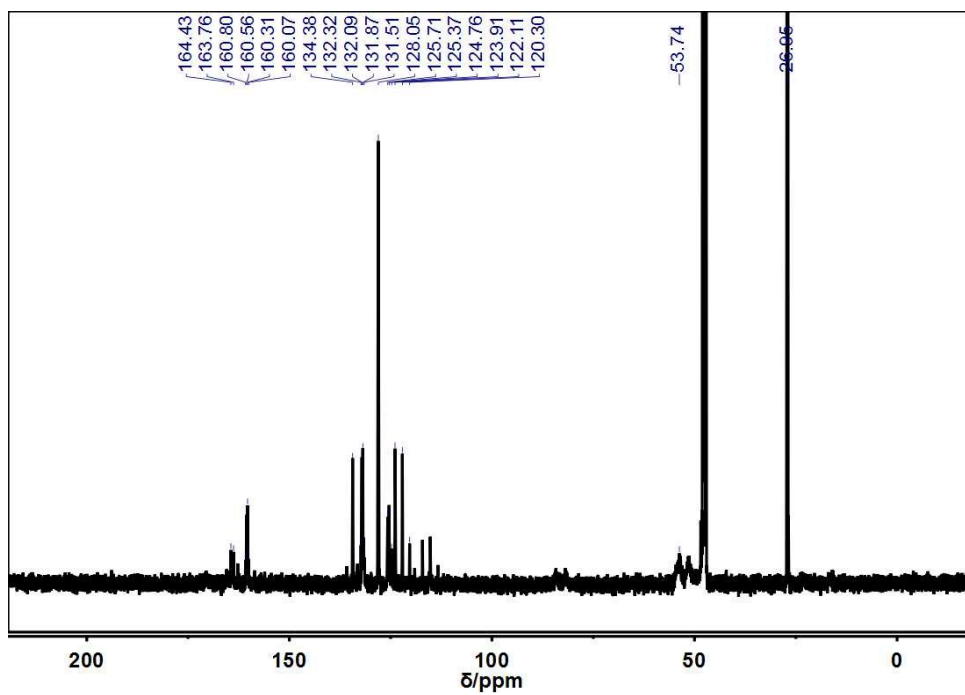

$^1\text{H}$ -NMR and  $^{13}\text{C}$ -NMR spectra of compound **6**

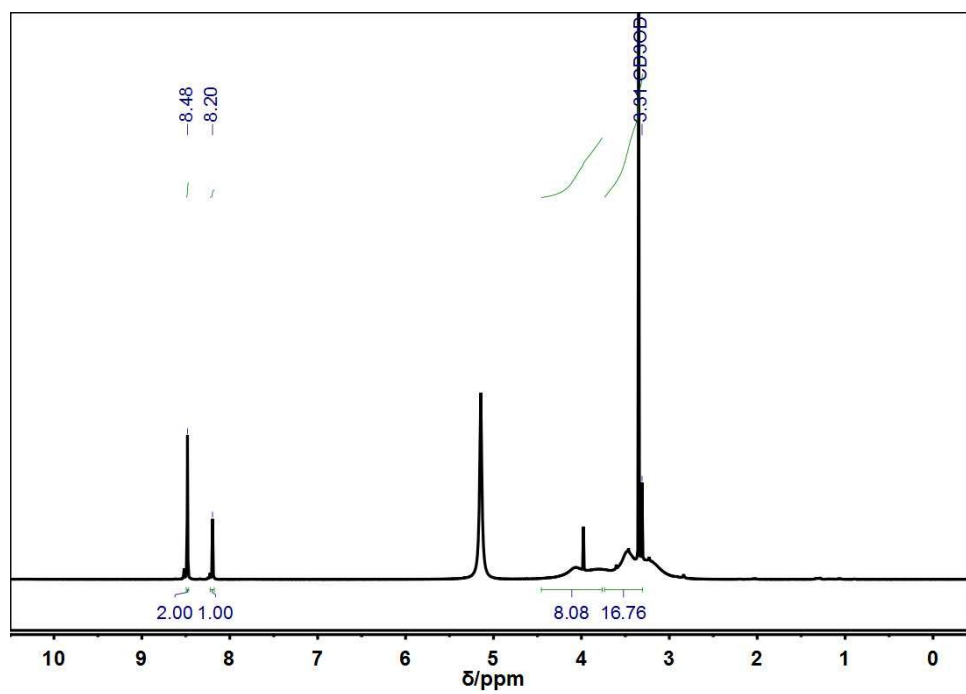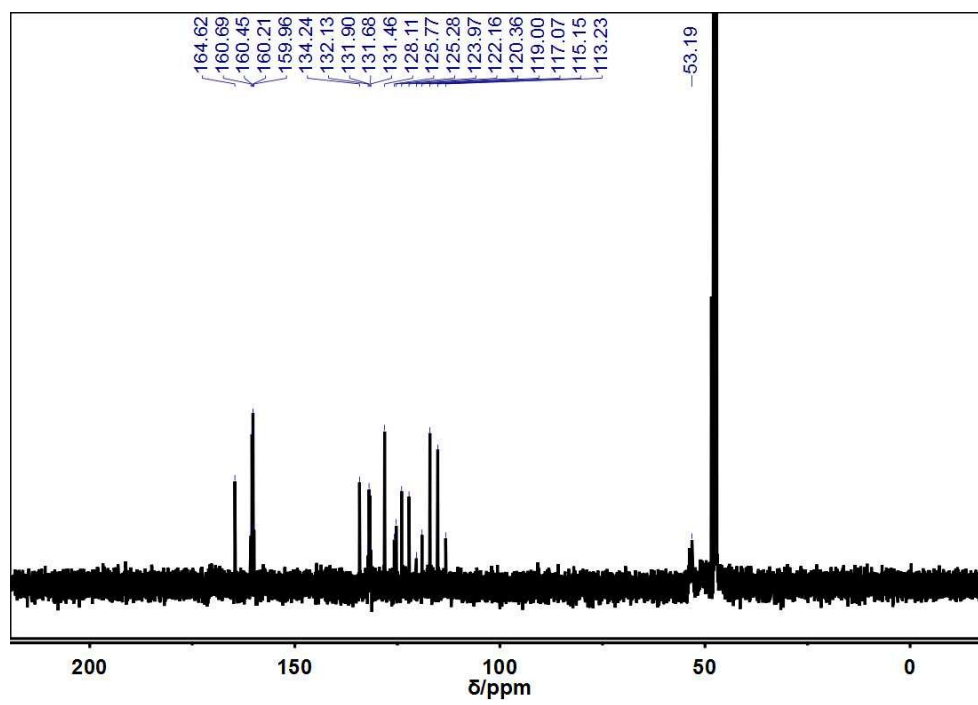



### HRMS spectrum of Compound 4

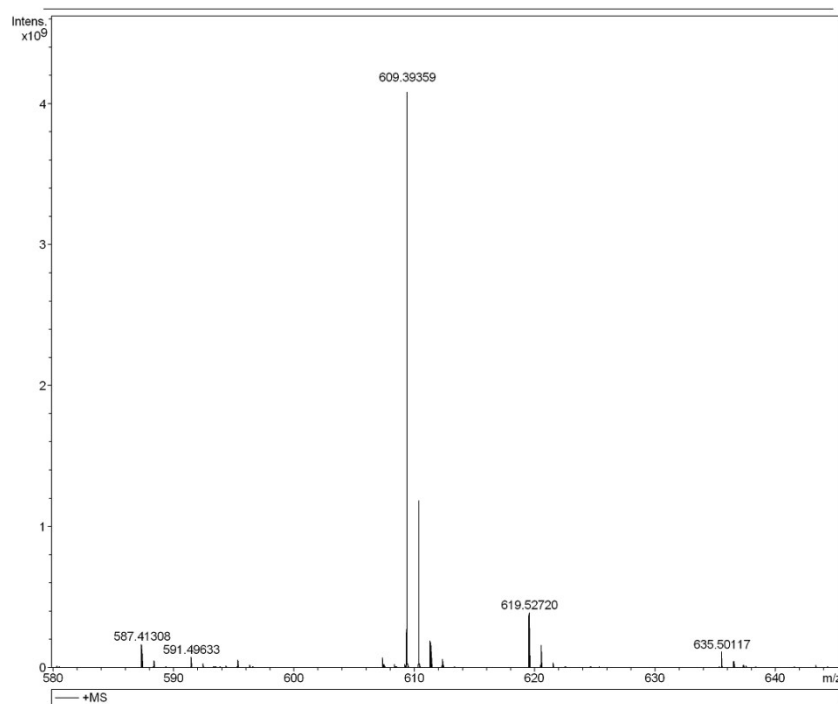

### HRMS spectrum of Compound 5

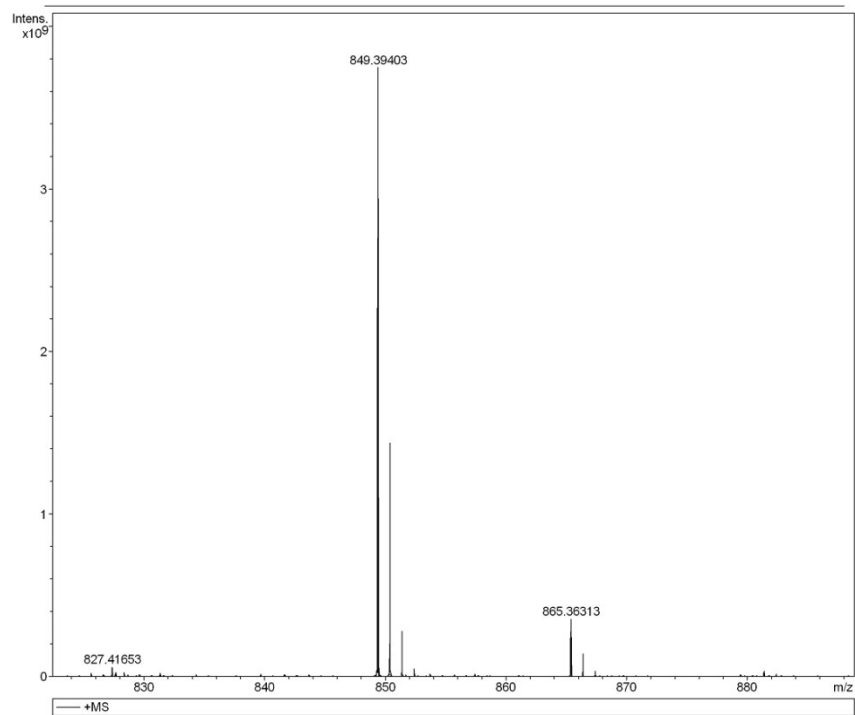

## HRMS spectrum of Compound 6

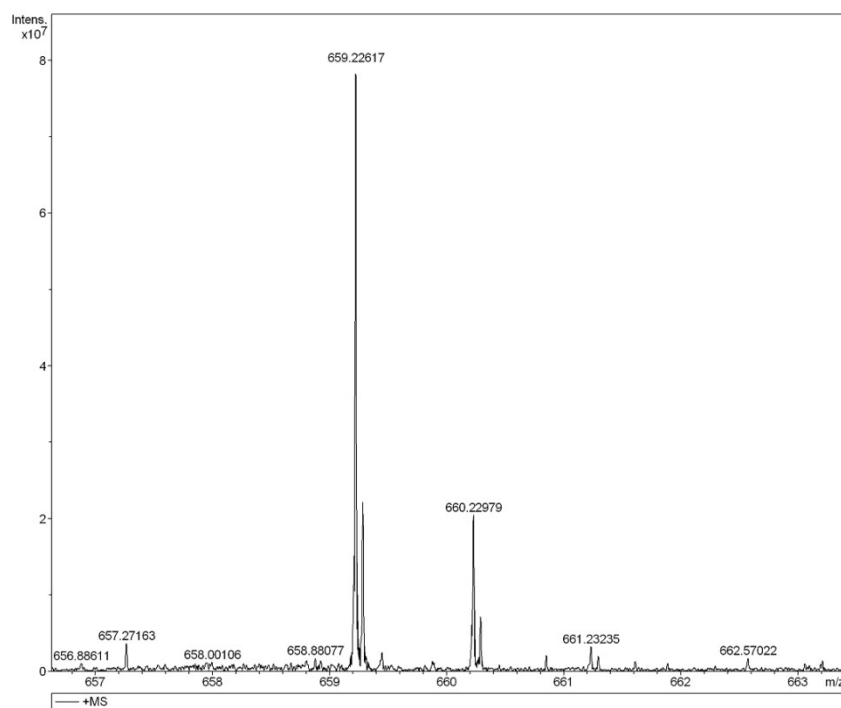

## Isotopic HRMS spectrum of Probe 1

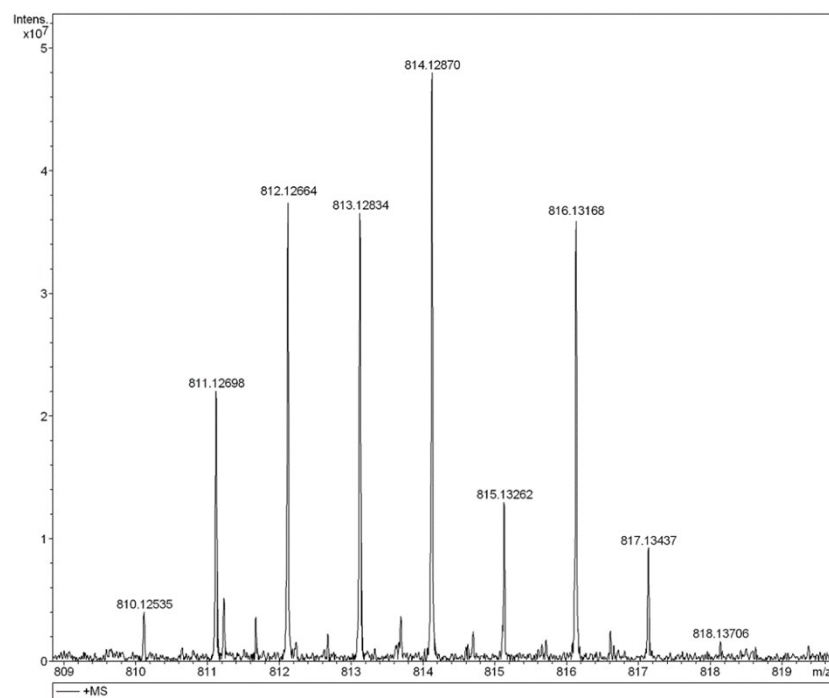

Supplement: c9cc06622e1.pdf [file c9cc06622e1.pdf]
